# Supplementary material for: Analgesic effect of a mixed T-type channel inhibitor/CB2 receptor agonist
Source: PubMed Central journal article supplement (PMC3703287; doi:10.1186/1744-8069-9-32), 2013-07-01

**Analgesic effect of a mixed T-type channel inhibitor/CB<sub>2</sub> receptor agonist**

**Vinicius M. Gadotti<sup>1</sup>, Haitao You<sup>1</sup>, Ravil R. Petrov<sup>2</sup>, Nelson D. Berger<sup>1</sup>, Philippe Diaz<sup>2</sup> and Gerald W. Zamponi<sup>1,\*</sup>**

<sup>1</sup>Department of Physiology and Pharmacology, Hotchkiss Brain Institute,  
University of Calgary, Calgary, Canada

<sup>2</sup>Core Laboratory for Neuromolecular Production, The University of Montana, Missoula, MT,  
USA

\*Alberta Innovates Health Solutions Scientist and a Canada Research Chair in Molecular Neurobiology. To whom correspondence should be addressed. Tel.: 403-220-8687; Fax: 403-210-8106; E-mail: [zamponi@ucalgary.ca](mailto:zamponi@ucalgary.ca).

|                                                                                                                |      |
|----------------------------------------------------------------------------------------------------------------|------|
| Synthesis of 2-(Dimethylamino)ethyl 9-pentyl-9 <i>H</i> -carbazole-3-carboxylate hydrochloride (NMP181). ..... | iii  |
| <sup>1</sup> H NMR of NMP181 hydrochloride in DMSO- <i>d</i> <sub>6</sub> , Bruker 400 .....                   | v    |
| <sup>13</sup> C NMR of NMP181 hydrochloride in DMSO- <i>d</i> <sub>6</sub> , Bruker 400 .....                  | vi   |
| <sup>13</sup> C DEPT135 NMR of NMP181 hydrochloride in DMSO- <i>d</i> <sub>6</sub> , Bruker 400 .....          | vii  |
| <sup>13</sup> C DEPT90 NMR of NMP181 hydrochloride in DMSO- <i>d</i> <sub>6</sub> , Bruker 400 .....           | viii |
| NMP181 (5.88 min, 100%, ESI: <i>m/z</i> 353.2029 (M + H) <sup>+</sup> ) .....                                  | ix   |

**Synthesis of 2-(Dimethylamino)ethyl 9-pentyl-9H-carbazole-3-carboxylate hydrochloride (NMP181).**

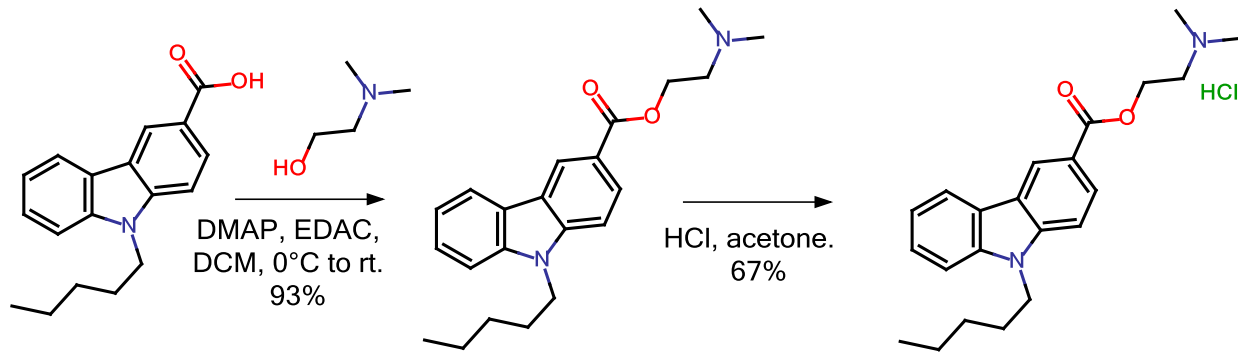

9-Pentyl-9H-carbazole-3-carboxylic acid (**1**) (100 mg, 0.36 mmol), 2-(dimethylamino)ethanol (36  $\mu$ L, 0.36 mmol), and DMAP (87 mg, 0.71 mmol) were added to DCM (20 mL) under nitrogen. EDC (200 mg, 1.04 mmol) was added to the solution, and the reaction mixture was stirred for 16 h while warming at room temperature. The solvent was removed *in vacuo*, and the obtained residue was extracted with EtOAc (100 mL). The organic layer was washed consecutively with concentrated sodium bicarbonate (50 mL  $\times$  3), brine (50 mL), dried over magnesium sulfate, filtered, and concentrated *in vacuo*. The residue was purified on a Biotage® KP-NH cartridge (amino-modified silica gel) using heptanes/EtOAc in different proportions to afford the title compound as a clear, light yellow viscous oil (117 mg, 93%).  $^1\text{H}$  NMR (500 MHz,  $\text{CDCl}_3$ )  $\delta$  8.81 (d,  $J = 1.5$  Hz, 1H), 8.16 (dd,  $J = 8.6, 1.7$  Hz, 1H), 8.12 (d,  $J = 7.7$  Hz, 1H), 7.49 – 7.43 (m, 1H), 7.36 (d,  $J = 8.2$  Hz, 1H), 7.33 (d,  $J = 8.6$  Hz, 1H), 7.28 – 7.23 (m, 1H), 4.48 (t,  $J = 5.9$  Hz, 2H), 4.21 (t,  $J = 7.2$  Hz, 2H), 2.76 (t,  $J = 5.9$  Hz, 2H), 2.36 (s, 6H), 1.81 (p,  $J = 7.3$  Hz, 2H), 1.34 – 1.26 (m, 4H), 0.84 (t,  $J = 6.9$  Hz, 3H).  $^{13}\text{C}$  NMR and DEPT (126 MHz,  $\text{CDCl}_3$ )  $\delta$  167.46 (C=O), 143.17 (C), 141.03 (C), 127.38 (CH), 126.35 (CH), 123.00 (CH), 122.58 (C), 120.71 (CH), 120.68 (C), 119.84 (CH), 109.17 (CH), 108.19 (CH), 62.89 ( $\text{CH}_2$ ), 58.14 ( $\text{CH}_2$ ), 46.04 ( $\text{CH}_3$ ), 43.25 ( $\text{CH}_2$ ), 29.39 ( $\text{CH}_2$ ), 28.67 ( $\text{CH}_2$ ), 22.51 ( $\text{CH}_2$ ), 14.02 ( $\text{CH}_3$ ). ESI:  $m/z$  353.1 ( $\text{M} + \text{H}$ ) $^+$ . HRMS calcd for  $\text{C}_{22}\text{H}_{29}\text{N}_2\text{O}_2$  ( $\text{M} + \text{H}$ ) $^+$  353.2229, found 353.2260.

Compound **NMP181** was also isolated as a hydrochloride salt by adding aqueous hydrochloric acid (1 equiv) to a vigorously stirred solution of NMP181 in acetone at 0 °C. After 1 h the

solvent was removed by reduced pressure, and the obtained residue was sonicated in anhydrous diethyl ether for 30 min. The resulting precipitate was collected by filtration, washed with diethyl ether, and dried overnight in high *vacuo* to produce the title compound as a white solid (67%); mp. 133-136 °C.

# <sup>1</sup>H NMR of NMP181 hydrochloride in DMSO-d<sub>6</sub>, Bruker 400

| Parameter              | Value               |
|------------------------|---------------------|
| Solvent                | DMSO                |
| Pulse Sequence         | zg30                |
| Acquisition Date       | 2012-12-11T00:34:47 |
| Temperature            | 296.1               |
| Number of Scans        | 16                  |
| Spectrometer Frequency | 400.18              |
| Spectral Width         | 4835.6              |
| Lowest Frequency       | -44.7               |
| Nucleus                | 1H                  |
| Acquired Size          | 32768               |
| Spectral Size          | 65536               |

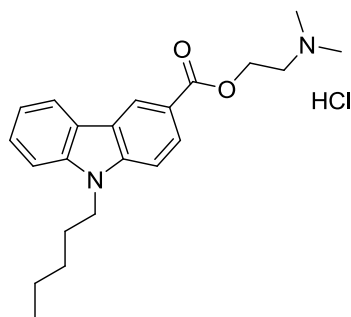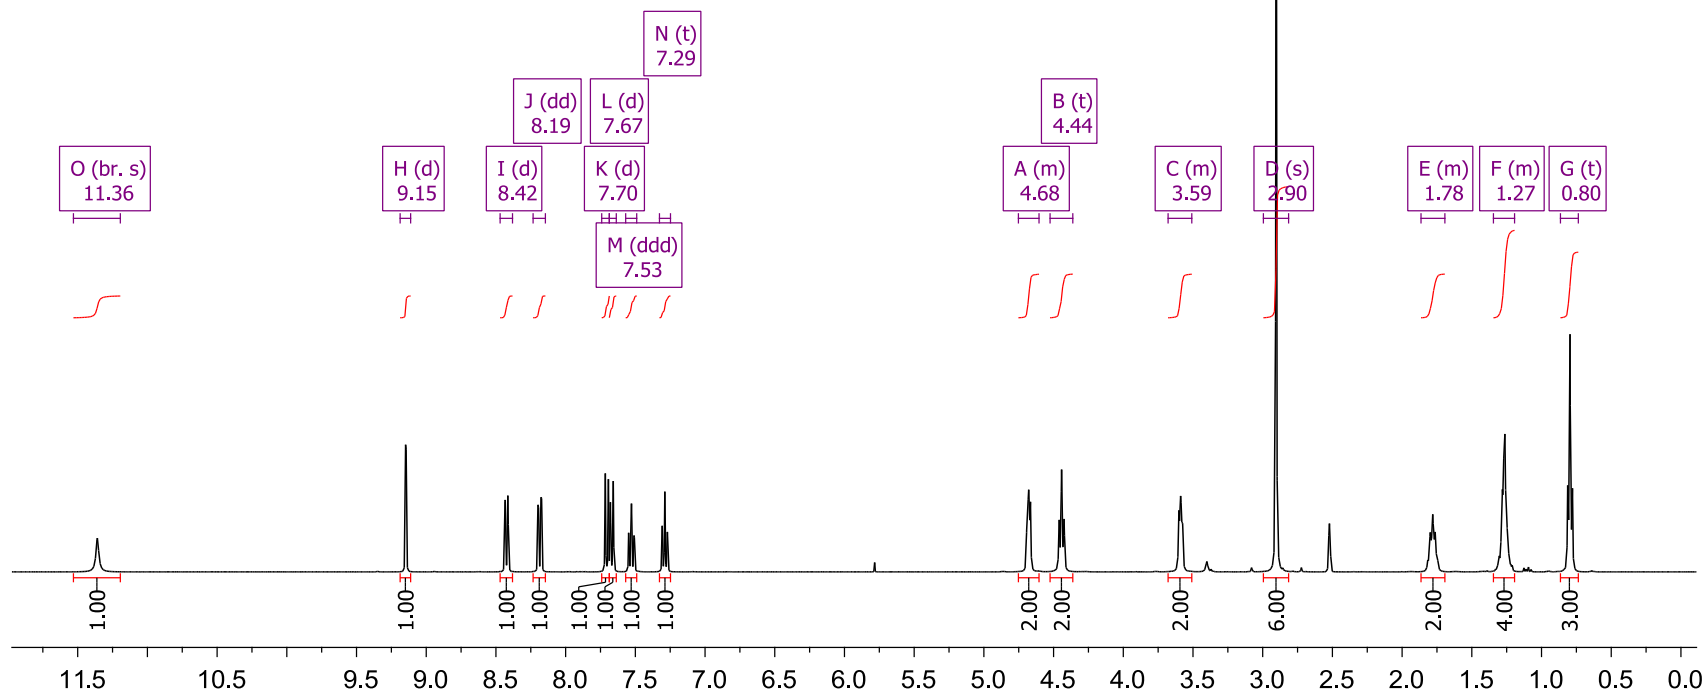

# <sup>13</sup>C NMR of NMP181 hydrochloride in DMSO-d<sub>6</sub>, Bruker 400

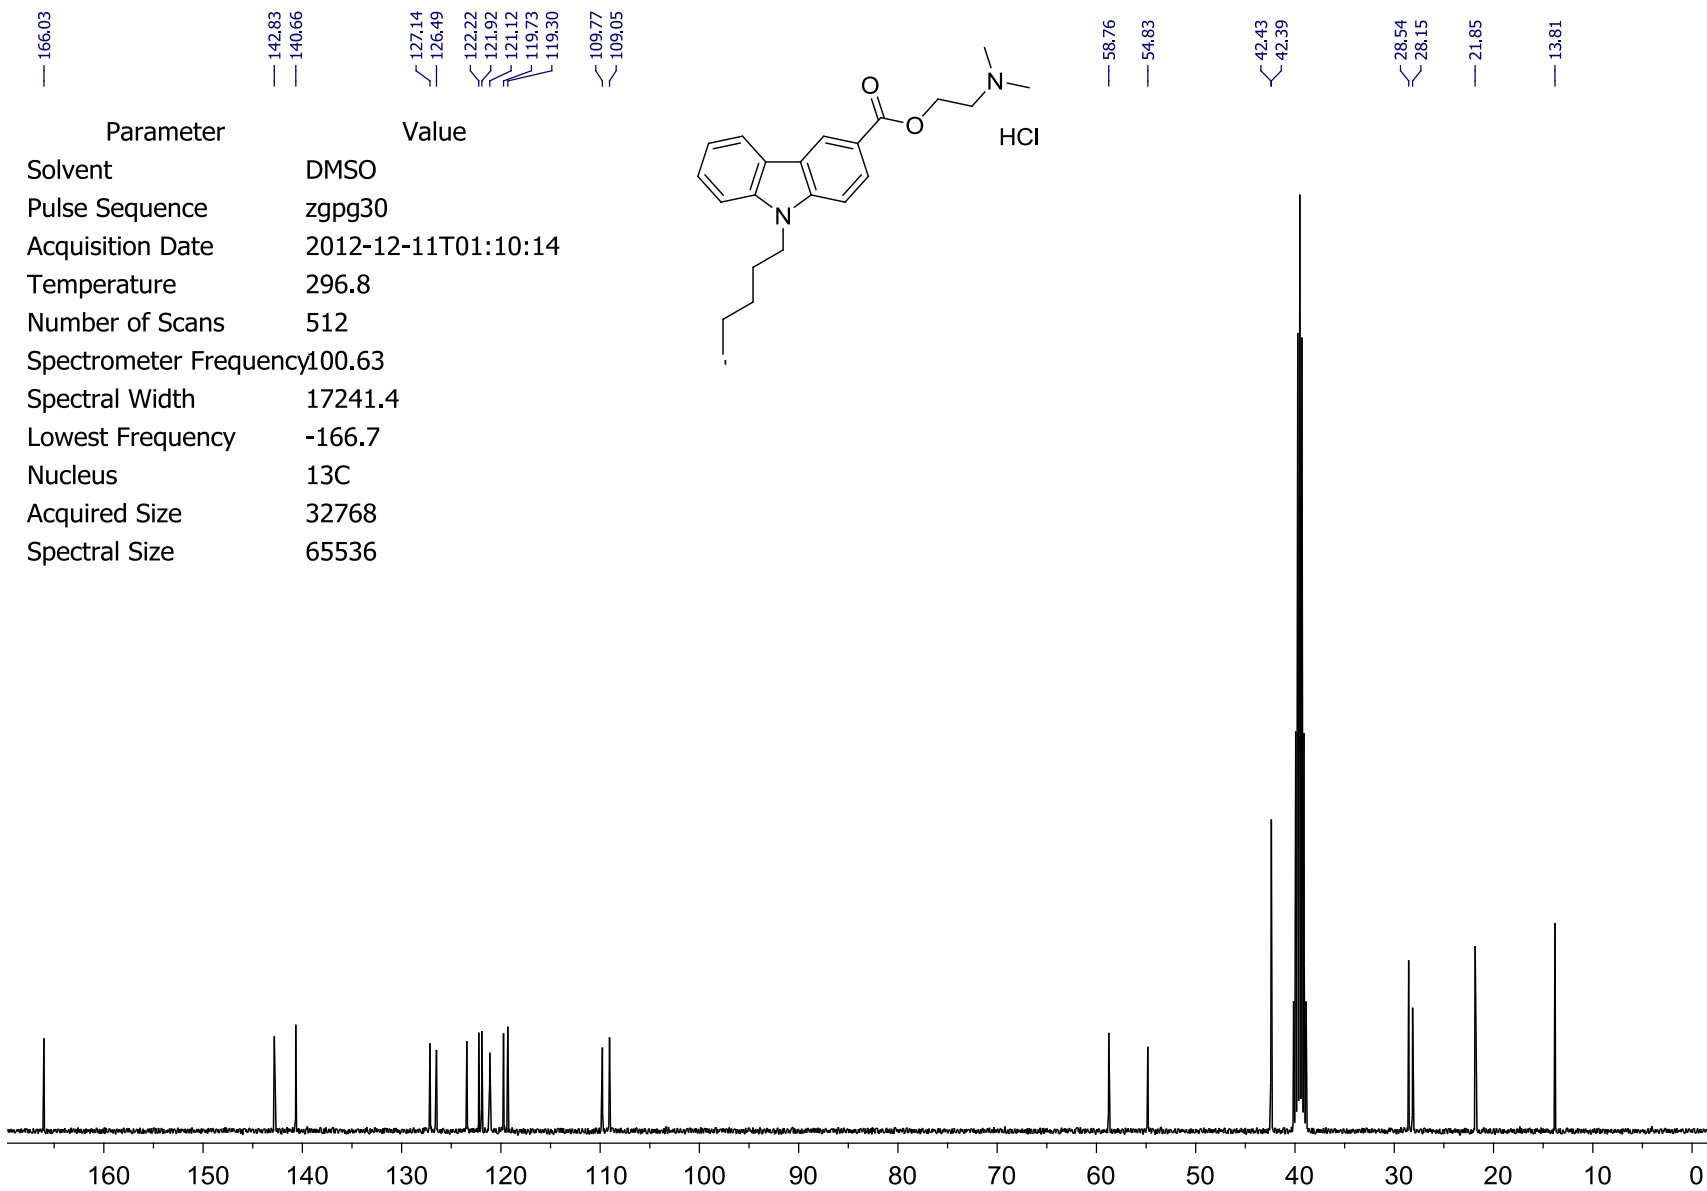

**<sup>13</sup>C DEPT135 NMR of NMP181 hydrochloride in DMSO-d<sub>6</sub>, Bruker 400**

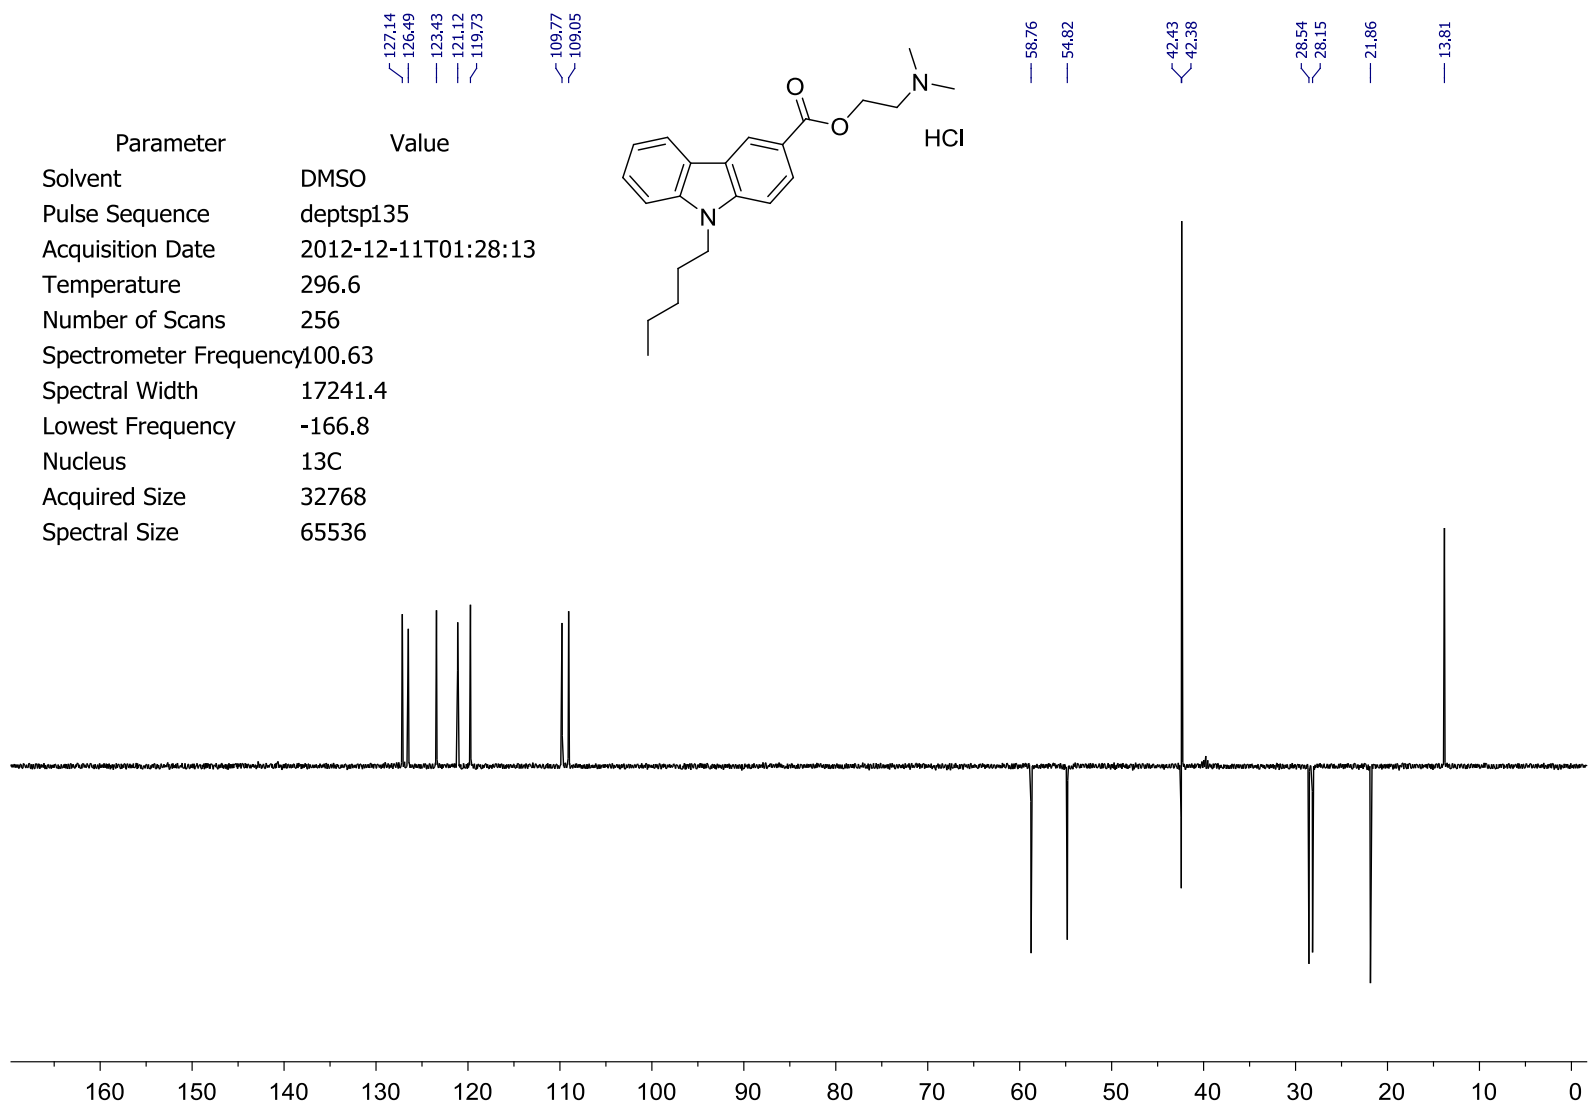

# <sup>13</sup>C DEPT90 NMR of NMP181 hydrochloride in DMSO-*d*<sub>6</sub>, Bruker 400

127.14  
126.49  
123.42  
121.12  
119.73  
109.77  
109.05

| Parameter              | Value               |
|------------------------|---------------------|
| Solvent                | DMSO                |
| Pulse Sequence         | dept90              |
| Acquisition Date       | 2012-12-11T01:46:12 |
| Temperature            | 296.5               |
| Number of Scans        | 256                 |
| Spectrometer Frequency | 100.63              |
| Spectral Width         | 17241.4             |
| Lowest Frequency       | -167.1              |
| Nucleus                | 13C                 |
| Acquired Size          | 32768               |
| Spectral Size          | 65536               |

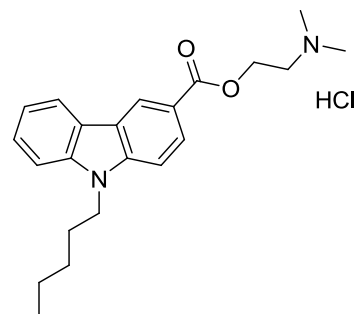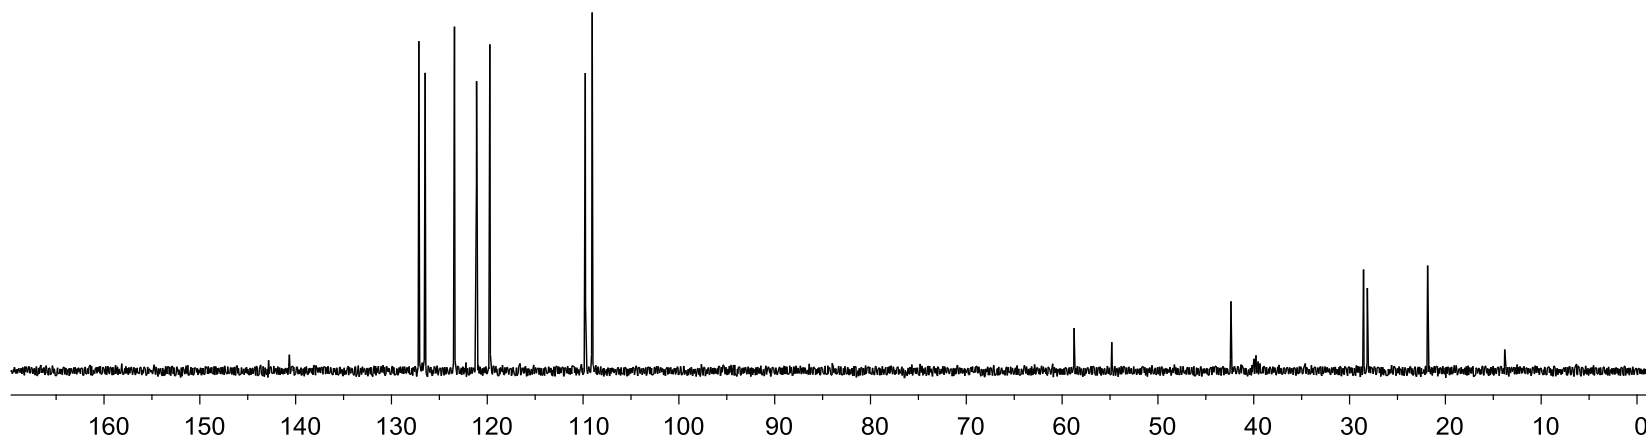



NMP181 (5.88 min, 100%, ESI:  $m/z$  353.2029 (M + H)<sup>+</sup>)

RP\_III\_80\_3

RP\_III\_80b\_3 Sm (Mn, 1x2)

3: Diode Array  
254

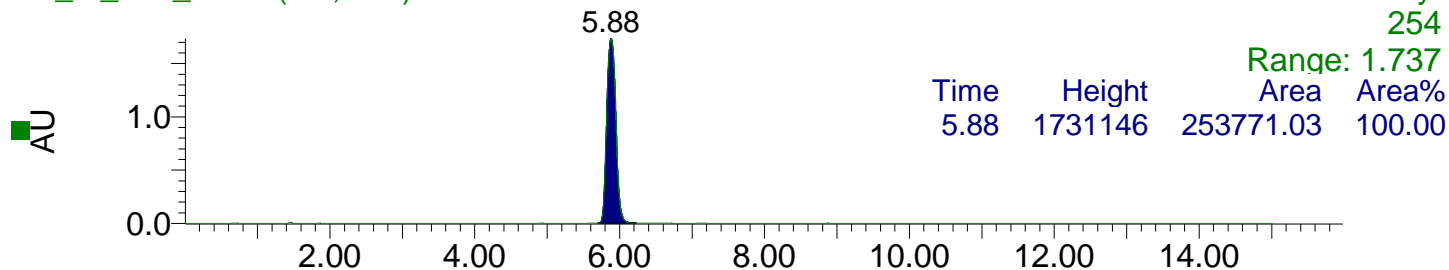

RP\_III\_80b\_3

1: TOF MS ES+  
TIC  
7.43e5

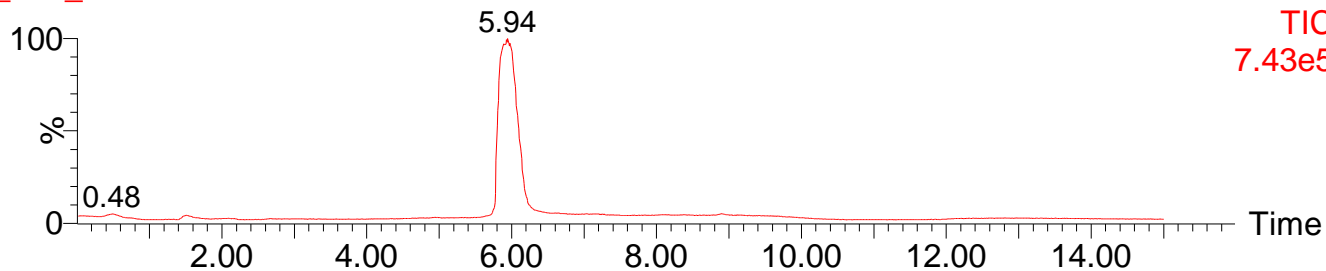

RP\_III\_80\_3

RP\_III\_80b\_3 592 (5.944) Cm (580:616)

1: TOF MS ES+  
5.37e6

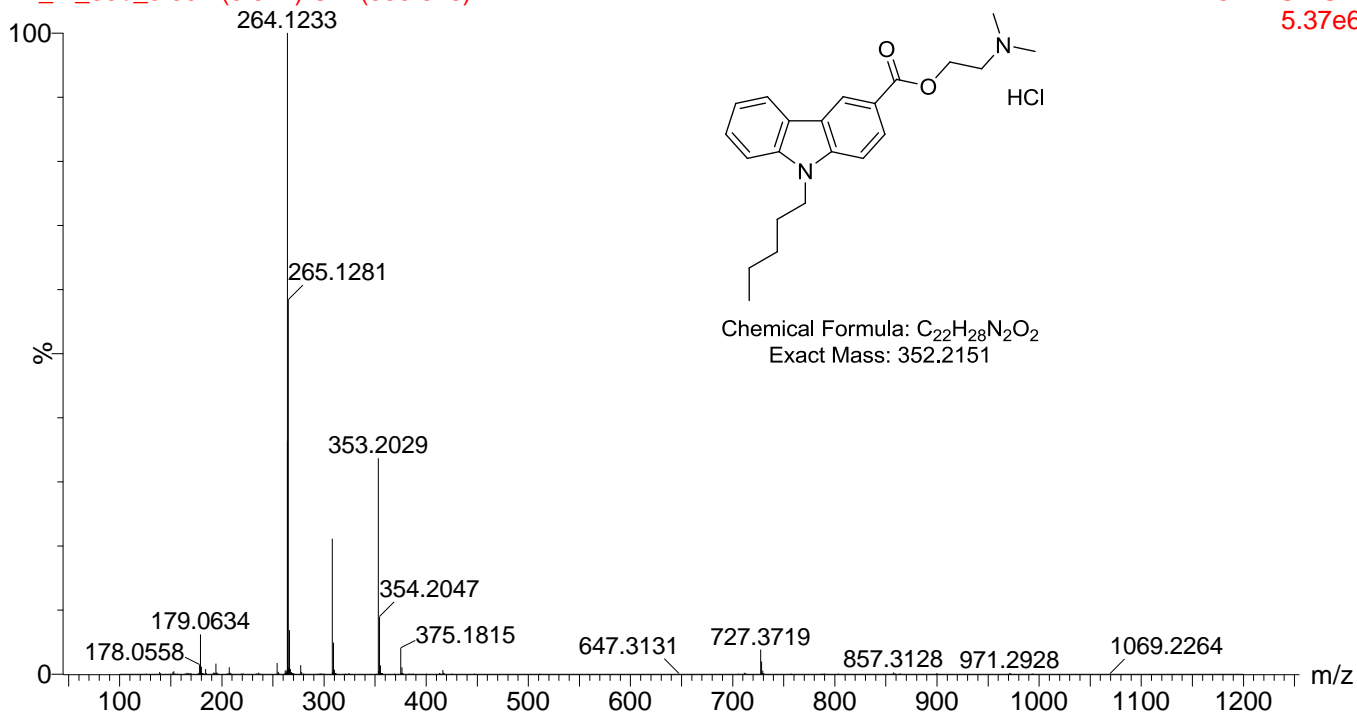

Supplement: 1744-8069-9-32-S1.pdf [file 1744-8069-9-32-S1.pdf]
